# Supplementary material for: Circulating small extracellular vesicles microRNAs plus CA-125 for treatment stratification in advanced ovarian cancer
Source: Springer Nature journal article supplement (doi:10.1186/s12967-023-04774-4), 2023-12-22
Supplement: MOESM1 [file 26559260]

## Supplementary Tables

**Table S1. 51 selected miRNAs ranked by logFC × P value (miRNA-seq data)**

| miRNA           | logFC        | P value     |
|-----------------|--------------|-------------|
| hsa-miR-1268b   | 6.524567708  | 0.000000533 |
| hsa-miR-1268a   | 6.525002054  | 0.000000699 |
| hsa-miR-4466    | 5.96884733   | 0.00000228  |
| hsa-miR-320e    | 4.444697106  | 0.00000244  |
| hsa-miR-320a-3p | 3.996376421  | 0.00000607  |
| hsa-miR-3180-3p | 5.201573618  | 0.00000821  |
| hsa-miR-3180    | 5.201573618  | 0.00000821  |
| hsa-miR-320b    | 4.144389384  | 0.0000107   |
| hsa-miR-378c    | 3.746973292  | 0.0000133   |
| hsa-miR-4429    | 4.140066797  | 0.0000166   |
| hsa-miR-204-3p  | 4.444515351  | 0.0000205   |
| hsa-miR-1228-5p | 5.155282818  | 0.0000275   |
| hsa-miR-378d    | 3.500830991  | 0.0000371   |
| hsa-miR-210-3p  | 3.751611987  | 0.0000507   |
| hsa-miR-320c    | 3.913906983  | 0.0000647   |
| hsa-miR-320d    | 3.41102307   | 0.0000977   |
| hsa-miR-483-5p  | 5.51086822   | 0.000159712 |
| hsa-miR-193a-5p | 3.054098377  | 0.000190597 |
| hsa-miR-378f    | 3.019575676  | 0.00028609  |
| hsa-miR-193b-5p | 3.181715872  | 0.000356465 |
| hsa-miR-92b-5p  | 3.168144484  | 0.00046643  |
| hsa-miR-23a-5p  | 3.985625677  | 0.000515949 |
| hsa-miR-4508    | 3.161609242  | 0.000538284 |
| hsa-miR-296-3p  | 4.583428706  | 0.000553897 |
| hsa-miR-378a-3p | 2.441412659  | 0.000781566 |
| hsa-miR-574-5p  | 2.867134178  | 0.00194959  |
| hsa-miR-192-5p  | 2.356751319  | 0.004978032 |
| hsa-miR-200c-3p | 2.493437702  | 0.006004055 |
| hsa-miR-423-5p  | 2.234052743  | 0.006706894 |
| hsa-miR-708-5p  | -4.839038271 | 0.00740506  |

miRNA, microRNA; FC, fold change.

**Table S1. 51 selected miRNAs ranked by logFC × P value (miRNA-seq data)**

| miRNA           | logFC        | P value     |
|-----------------|--------------|-------------|
| hsa-miR-576-3p  | 2.267916683  | 0.007767367 |
| hsa-miR-27a-5p  | -2.079362343 | 0.008138721 |
| hsa-miR-145-3p  | -1.983973431 | 0.009036106 |
| hsa-miR-378i    | 1.786939288  | 0.010810812 |
| hsa-miR-1307-3p | 1.876802327  | 0.014652655 |
| hsa-miR-134-5p  | 1.965724978  | 0.014909171 |
| hsa-miR-27a-3p  | -1.73414236  | 0.016289525 |
| hsa-let-7d-3p   | -1.830102743 | 0.016358829 |
| hsa-miR-200b-3p | 2.08701507   | 0.017105133 |
| hsa-miR-425-3p  | 2.182146297  | 0.021104559 |
| hsa-miR-1908-5p | 1.914822438  | 0.027228563 |
| hsa-miR-148a-5p | 1.763492298  | 0.027638532 |
| hsa-miR-133a-3p | 2.343411857  | 0.031330922 |
| hsa-miR-629-5p  | 1.889319093  | 0.03193781  |
| hsa-miR-671-5p  | 2.265121056  | 0.032108301 |
| hsa-miR-4488    | 1.914908497  | 0.033640396 |
| hsa-miR-223-5p  | -1.662332383 | 0.034344872 |
| hsa-miR-10b-5p  | -1.579421923 | 0.043898787 |
| hsa-miR-338-5p  | -1.494317432 | 0.04428883  |
| hsa-miR-3960    | 2.40192849   | 0.044384245 |
| hsa-miR-451a    | -1.329068528 | 0.049320672 |

miRNA, microRNA; FC, fold change.

**Table S2. Fold changes, corresponding P, and AUC values of 15 candidate miRNAs in the discovery cohort**

| miRNA       | FC    | P value       | AUC   |
|-------------|-------|---------------|-------|
| miR-1307-3p | 3.315 | <b>0.009</b>  | 0.776 |
| miR-320a-3p | 2.186 | <b>0.0199</b> | 0.756 |
| miR-378a-3p | 2.943 | <b>0.0217</b> | 0.747 |
| miR-27a-3p  | 3.464 | <b>0.0274</b> | 0.636 |
| miR-320b    | 2.094 | <b>0.0387</b> | 0.733 |
| miR-200c-3p | 9.843 | <b>0.0391</b> | 0.711 |
| let-7d-3p   | 0.368 | <b>0.0421</b> | 0.693 |
| miR-423-5p  | 2.126 | <b>0.0427</b> | 0.704 |
| miR-451a    | 3.114 | 0.0512        | 0.693 |
| miR-193a-5p | 1.781 | 0.0583        | 0.667 |
| miR-223-5p  | 2.77  | 0.0671        | 0.684 |
| miR-192-5p  | 4.927 | 0.0743        | 0.733 |
| miR-483-5p  | 2.533 | 0.1063        | 0.647 |
| miR-210-3p  | 1.613 | 0.1234        | 0.664 |
| miR-204-3p  | 0.988 | 0.9719        | 0.578 |

Significant P values in bold. miRNA, microRNA; FC, fold change; AUC, area under the receiver operating characteristic curve.

**Table S3. PCR primer and probe sequences**

| miRNA              | Sequences                                            |
|--------------------|------------------------------------------------------|
| hsa-miR-320a-3p-RT | GTCGTATCCAGTGCAGGGTCCGAGGTATTCGCACTGGATACGACTCGCCC   |
| hsa-miR-320a-3p-F  | ACGCAAAGCTGGGTTGAGA                                  |
| hsa-miR-320a-3p-P  | TTCGCACTGGATACGACTCGCCC                              |
| hsa-miR-320b-RT    | GTCGTATCCAGTGCAGGGTCCGAGGTATTCGCACTGGATACGACTTGCCC   |
| hsa-miR-320b-F     | ACGCAAAGCTGGGTTGAGA                                  |
| hsa-miR-320b-P     | TTCGCACTGGATACGACTTGCCC                              |
| hsa-miR-204-3p-RT  | GTCGTATCCAGTGCAGGGTCCGAGGTATTCGCACTGGATACGACACGTCC   |
| hsa-miR-204-3p-F   | AGGTGCTGGGAAGGCAAAG                                  |
| hsa-miR-204-3p-P   | TTCGCACTGGATACGACACGTCC                              |
| hsa-miR-210-3p-RT  | GTCGTATCCAGTGCAGGGTCCGAGGTATTCGCACTGGATACGACTCAGCCGC |
| hsa-miR-210-3p-F   | AGTCCTGTGCGTGTGACA                                   |
| hsa-miR-210-3p-P   | TCGCACTGGATACGACTCAGCCGC                             |
| hsa-miR-483-5p-RT  | GTCGTATCCAGTGCAGGGTCCGAGGTATTCGCACTGGATACGACCTCCCT   |
| hsa-miR-483-5p-F   | ACGCAAGACGGGAGGAAAGA                                 |
| hsa-miR-483-5p-P   | TTCGCACTGGATACGACCTCCCT                              |
| hsa-miR-193a-5p-RT | GTCGTATCCAGTGCAGGGTCCGAGGTATTCGCACTGGATACGACTCATCTC  |
| hsa-miR-193a-5p-F  | ACTGGGTCTTTGCGGGC                                    |
| hsa-miR-193a-5p-P  | TTCGCACTGGATACGACTCATCTC                             |
| hsa-miR-378a-3p-RT | GTCGTATCCAGTGCAGGGTCCGAGGTATTCGCACTGGATACGACGCCTTC   |
| hsa-miR-378a-3p-F  | CCGACTGGACTTGGAGTCA                                  |
| hsa-miR-378a-3p-P  | TCGCACTGGATACGACGCCTTC                               |
| hsa-miR-192-5p-RT  | GTCGTATCCAGTGCAGGGTCCGAGGTATTCGCACTGGATACGACGGCTGT   |
| hsa-miR-192-5p-F   | ACCGCCTGACCTATGAATTG                                 |
| hsa-miR-192-5p-P   | TCGCACTGGATACGACGGCTGT                               |
| hsa-miR-200c-3p-RT | GTCGTATCCAGTGCAGGGTCCGAGGTATTCGCACTGGATACGACTCCATC   |
| hsa-miR-200c-3p-F  | ACGCTAATACTGCCGGTAAT                                 |
| hsa-miR-200c-3p-P  | TTCGCACTGGATACGACTCCATC                              |
| hsa-miR-423-5p-RT  | GTCGTATCCAGTGCAGGGTCCGAGGTATTCGCACTGGATACGACAAAGTCTC |
| hsa-miR-423-5p-F   | ACTGAGGGGCAGAGAGC                                    |
| hsa-miR-423-5p-P   | TTCGCACTGGATACGACAAAGTCTC                            |

RT, specific RT primer; F, forward primer; R, reverse primer; UR, universal reverse primer; P, probe.

**Table S3. PCR primer and probe sequences**

| <b>miRNA</b>       | <b>Sequences</b>                                     |
|--------------------|------------------------------------------------------|
| hsa-miR-27a-3p-RT  | GTCGTATCCAGTGCAGGGTCCGAGGTATTCGCACTGGATACGACGCGGAACT |
| hsa-miR-27a-3p-F   | ACGCTTCACAGTGGCTAAG                                  |
| hsa-miR-27a-3p-P   | CACTGGATACGACGCGGAACT                                |
| hsa-miR-1307-3p-RT | GTCGTATCCAGTGCAGGGTCCGAGGTATTCGCACTGGATACGACCACGAC   |
| hsa-miR-1307-3p-F  | AACTCGGCGTGGCGTCG                                    |
| hsa-miR-1307-3p-P  | TTCGCACTGGATACGACCACGAC                              |
| hsa-let-7d-3p-RT   | GTCGTATCCAGTGCAGGGTCCGAGGTATTCGCACTGGATACGACAGAAAGGC |
| hsa-let-7d-3p-F    | ACGCCTATACGACCTGCT                                   |
| hsa-let-7d-3p-P    | TCGCACTGGATACGACAGAAAGGC                             |
| hsa-miR-223-5p-RT  | GTCGTATCCAGTGCAGGGTCCGAGGTATTCGCACTGGATACGACAACTCAG  |
| hsa-miR-223-5p-F   | ACCGCCGTGTATTTGACAAG                                 |
| hsa-miR-223-5p-P   | TTCGCACTGGATACGACAACTCAG                             |
| hsa-miR-451a-RT    | GTCGTATCCAGTGCAGGGTCCGAGGTATTCGCACTGGATACGACAACTCAG  |
| hsa-miR-451a-F     | CCGCCAAACCGTTACCATTA                                 |
| hsa-miR-451a-P     | TTCGCACTGGATACGACAACTCAG                             |
| cel-miR-39-RT      | GTCGTATCCAGTGCAGGGTCCGAGGTATTCGCACTGGATACGACCAAGCT   |
| cel-miR-39-F       | CGCTCACCGGTGTAAATC                                   |
| cel-miR-39-P       | ATTCGCACTGGATACGACCAAGCT                             |
| U6-RT              | AACGCTTCACGAATTTGCGT                                 |
| U6-F               | AACGCTTCACGAATTTGCGT                                 |
| U6-R               | CTCGCTTCGGCAGCACA                                    |
| U6-P               | AGAAGATTAGCATGGCCCCTGCGCA                            |
| qPCR-UR            | GTGCAGGGTCCGAGGT                                     |

RT, specific RT primer; F, forward primer; R, reverse primer; UR, universal reverse primer; P, probe.

**Table S4. Baseline characteristics of the patients in screening cohort**

| <b>Characteristics</b>            | <b>Number of cases</b> | <b>R0 (n=17)</b> | <b>non-R0 (n=20)</b> |
|-----------------------------------|------------------------|------------------|----------------------|
| <b>Age (years)</b>                |                        |                  |                      |
| <60                               | 25                     | 12(70%)          | 13(65%)              |
| ≥60                               | 12                     | 5(30%)           | 7(35%)               |
| <b>FIGO Stage</b>                 |                        |                  |                      |
| III                               | 30                     | 16(94%)          | 14(70%)              |
| IV                                | 7                      | 1(6%)            | 6(30%)               |
| <b>Preoperative CA-125 (U/mL)</b> |                        |                  |                      |
| <600                              | 11                     | 8(47%)           | 3(15%)               |
| ≥600                              | 26                     | 9(53%)           | 17(85%)              |
| <b>Lymph node metastasis</b>      |                        |                  |                      |
| Positive                          | 24                     | 10(59%)          | 14(70%)              |
| Negative                          | 13                     | 7(41%)           | 6(30%)               |
| <b>P53 mutation</b>               |                        |                  |                      |
| Positive                          | 22                     | 11(65%)          | 12(60%)              |
| Negative                          | 14                     | 6(35%)           | 8(40%)               |

**Table S5. Baseline characteristics of the patients in discovery cohort**

| <b>Characteristics</b>            | <b>Number of cases</b> | <b>R0 (n=15)</b> | <b>non-R0 (n=15)</b> |
|-----------------------------------|------------------------|------------------|----------------------|
| <b>Age (years)</b>                |                        |                  |                      |
| <60                               | 21                     | 9(60%)           | 12(80%)              |
| ≥60                               | 9                      | 6(40%)           | 3(20%)               |
| <b>FIGO Stage</b>                 |                        |                  |                      |
| III                               | 26                     | 15(100%)         | 11(73%)              |
| IV                                | 4                      | 0(0)             | 4(27%)               |
| <b>Preoperative CA-125 (U/mL)</b> |                        |                  |                      |
| <600                              | 9                      | 7(47%)           | 2(13%)               |
| ≥600                              | 21                     | 8(53%)           | 13(86%)              |
| <b>Lymph node metastasis</b>      |                        |                  |                      |
| Positive                          | 21                     | 10(67%)          | 11(73%)              |
| Negative                          | 9                      | 5(33%)           | 4(27%)               |
| <b>P53 mutation</b>               |                        |                  |                      |
| Positive                          | 17                     | 9(60%)           | 8(53%)               |
| Negative                          | 13                     | 6(40%)           | 7(47%)               |

**Table S6. Baseline characteristics of the patients in validation cohort**

| <b>Characteristics</b>            | <b>Number of cases</b> | <b>R0 (n=67)</b> | <b>non-R0 (n=87)</b> |
|-----------------------------------|------------------------|------------------|----------------------|
| <b>Age (years)</b>                |                        |                  |                      |
| <60                               | 112                    | 46(69%)          | 66(76%)              |
| ≥60                               | 42                     | 21(31%)          | 21(24%)              |
| <b>FIGO Stage</b>                 |                        |                  |                      |
| III                               | 115                    | 64(96%)          | 51(59%)              |
| IV                                | 39                     | 3(4%)            | 36(41%)              |
| <b>Preoperative CA-125 (U/mL)</b> |                        |                  |                      |
| <600                              | 46                     | 32(48%)          | 14(16%)              |
| ≥600                              | 108                    | 35(52%)          | 73(84%)              |
| <b>Lymph node metastasis</b>      |                        |                  |                      |
| Positive                          | 97                     | 33(49%)          | 64(74%)              |
| Negative                          | 57                     | 34(50%)          | 23(26%)              |
| <b>P53 mutation</b>               |                        |                  |                      |
| Positive                          | 78                     | 37(55%)          | 41(47%)              |
| Negative                          | 76                     | 30(45%)          | 46(53%)              |



## Supplementary Figures

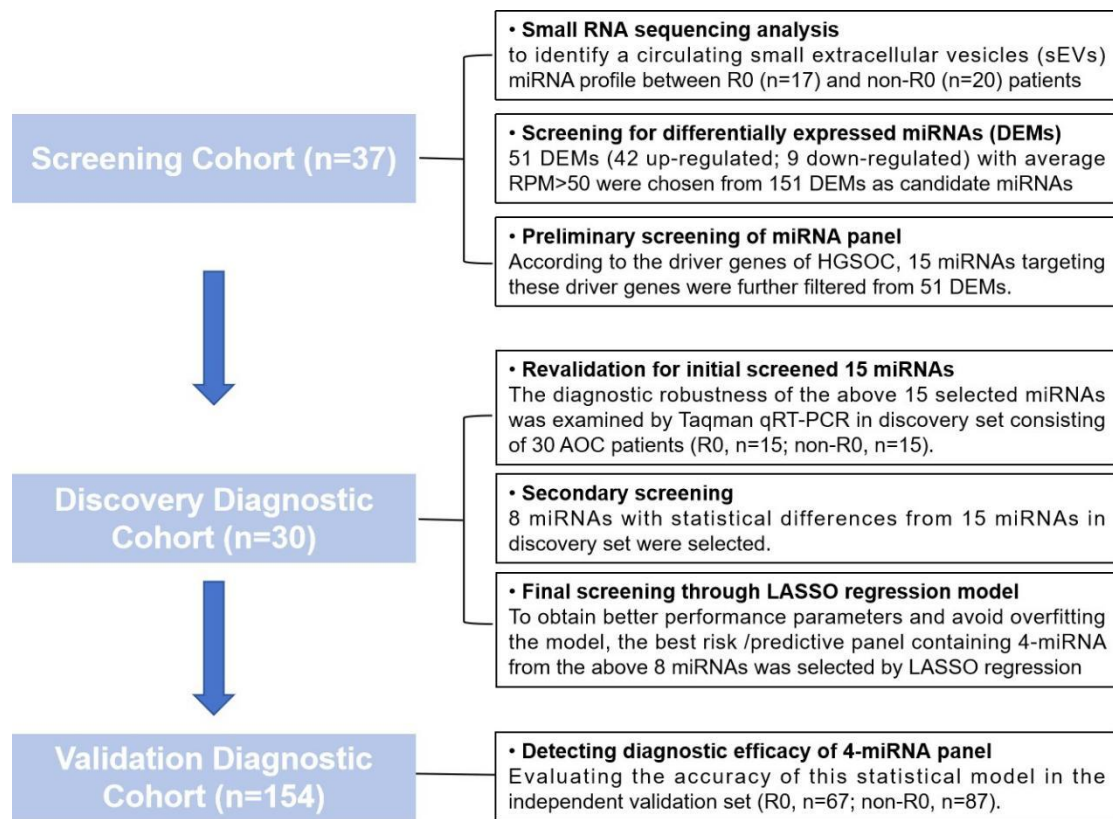

**Figure S1. The flowdiagram of the analysis through the three cohort.** Flowdiagram of study design was prepared to establish a diagnostic model for predicting residual disease risk in AOC patients. AOC, advanced ovarian cancer.

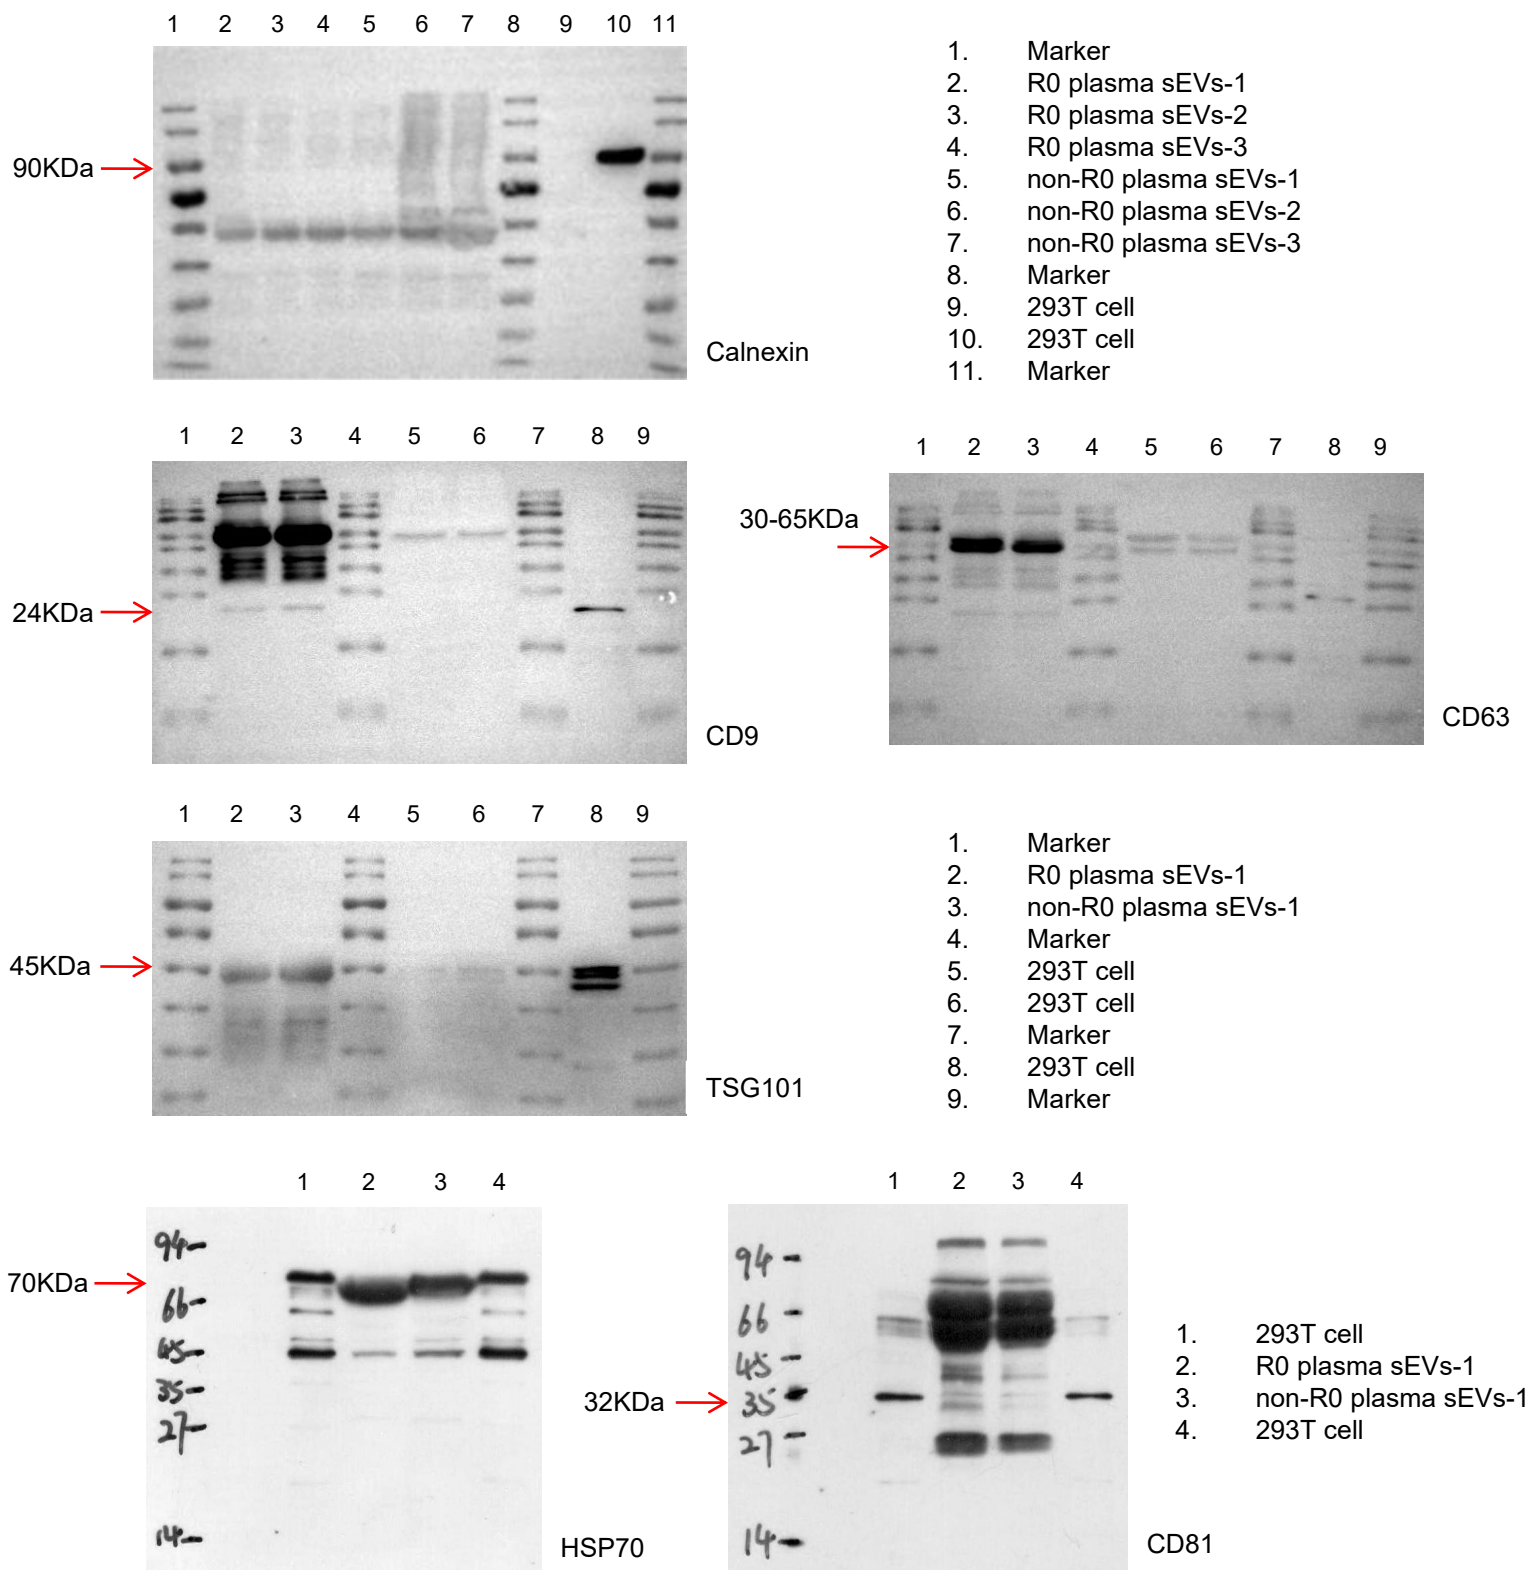

**Figure S2. Identification of sEVs extracted from AOC patients' plasma (western blotting)**

The sEVs typically protein markers CD9, CD63, TSG101, HSP70, CD81, and Calnexin were detected by western blotting analysis. sEVs, small extracellular vesicles; R0, advanced ovarian cancer patients with no residual disease; non-R0, advanced ovarian cancer patients with any residual disease.

**A****a**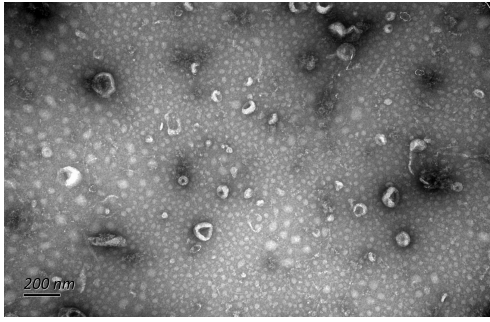**b**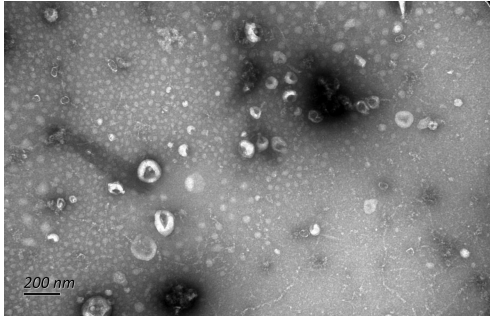**B****a**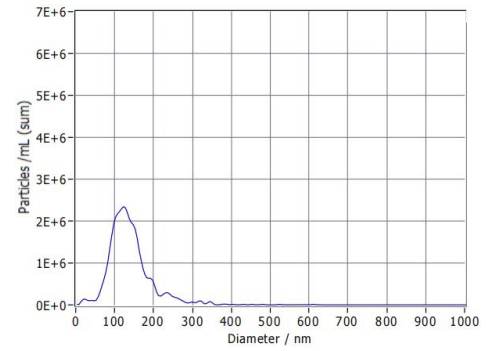**b**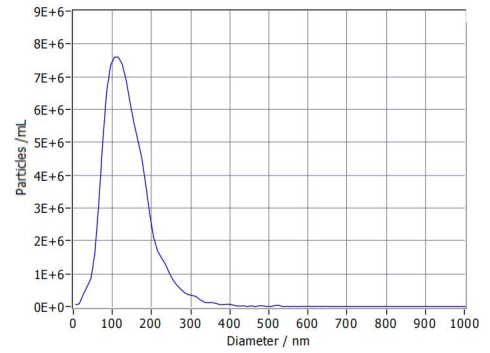**Figure S3. Identification of sEVs extracted from AOC patients' tissue (TEM/NTA)**

(A) Transmission electron microscopy (TEM) images of vesicles isolated from R0 (a) and non-R0 (b) patients' tissue. Scale bar, 200 nm. (B) Nanoparticle tracking analysis (NTA) determined the size distribution of vesicles isolated from R0 (a) and non-R0 (b) patients' tissue. R0, advanced ovarian cancer patients with no residual disease; non-R0, advanced ovarian cancer patients with any residual disease.

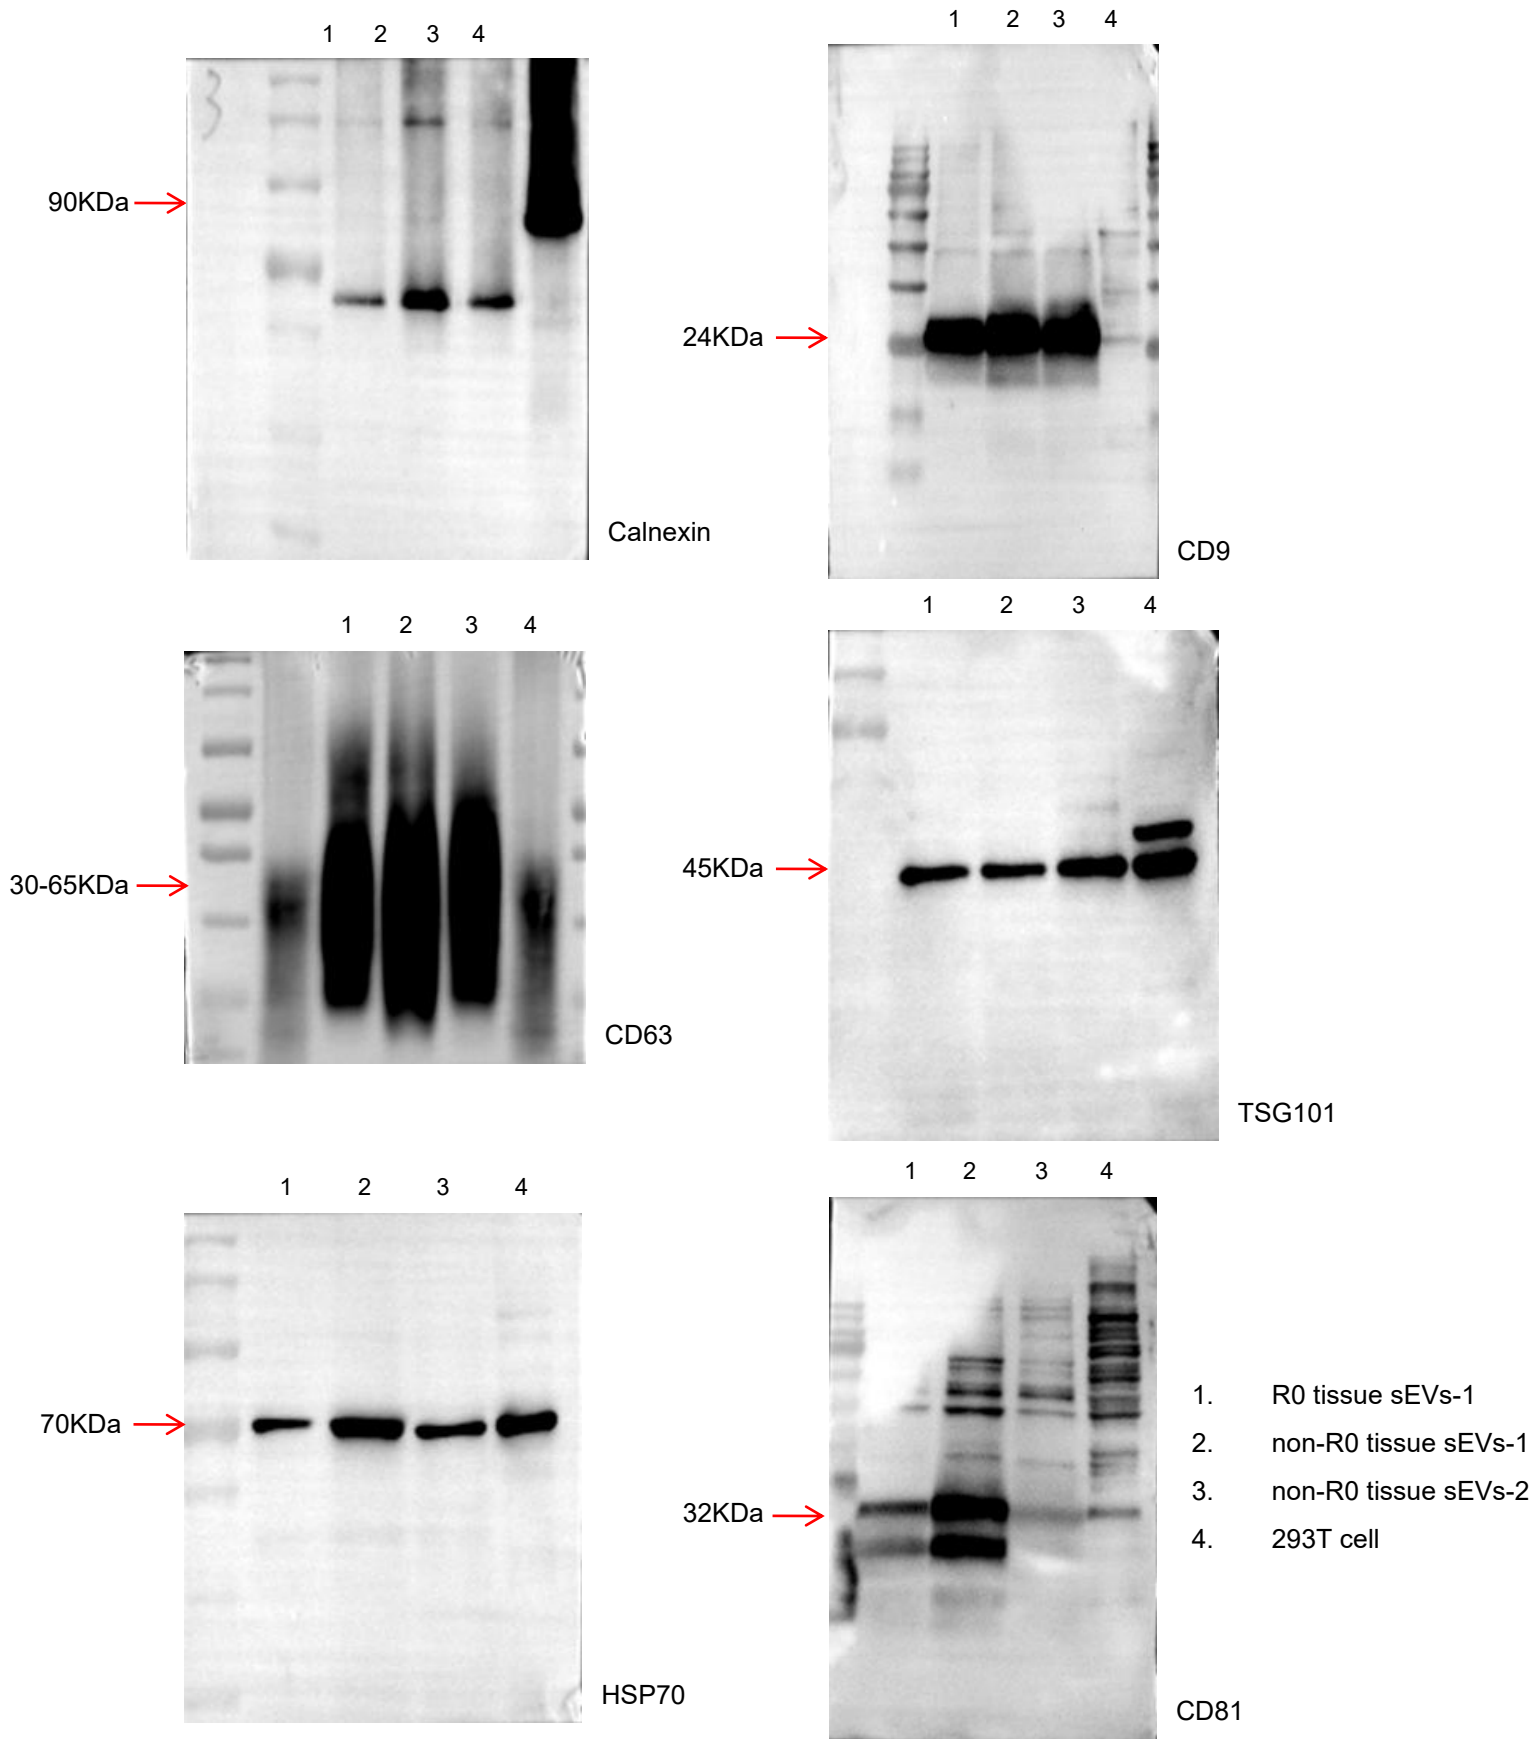

**Figure S4. Identification of sEVs extracted from AOC patients' tissue (western blotting)**

The sEVs typically protein markers CD9, CD63, TSG101, HSP70, CD81, and Calnexin were detected by western blotting analysis. sEVs, small extracellular vesicles; R0, advanced ovarian cancer patients with no residual disease; non-R0, advanced ovarian cancer patients with any residual disease.

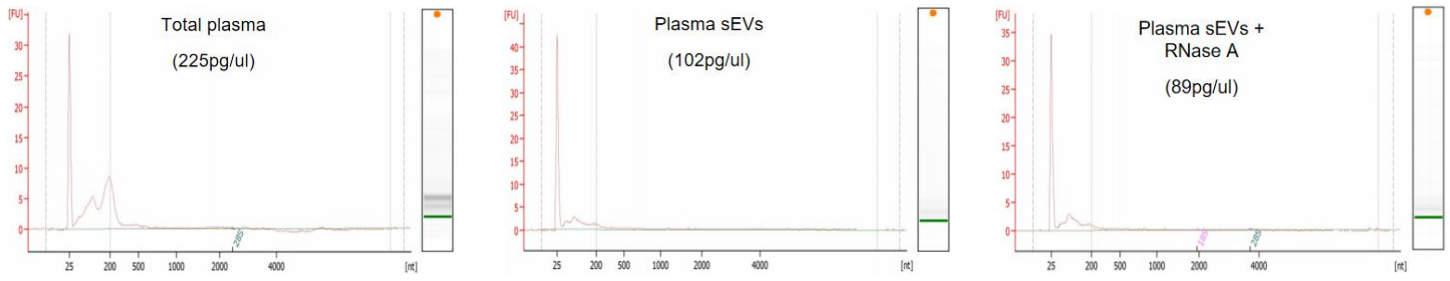

**Figure S5. Plasma content characteristic verification of 4-miRNA**

Representative Agilent 2100 Bioanalyzer results for RNA extracted from total plasma, plasma sEVs, and RNase A-treated plasma sEVs. miRNA, microRNA; sEVs, small extracellular vesicles.
